# Supplementary material for: Persistent Sleep Quality Deterioration among Post-COVID-19 Patients: Results from a 6-Month Follow-Up Study
Source: MDPI journal article supplement (doi:10.3390/jpm12111909), 2022-11-16
Supplement: s1 [file s1]

## Supplementary material

**Table S1. Comparison of PSQI Global score, Epworth sleepiness scale, FSS, STOP-Bang scale, AIS, according to participants' characteristics**

| Variables                                          | PSQI Global score |             | p                  |
|----------------------------------------------------|-------------------|-------------|--------------------|
|                                                    | <5                | ≥5          |                    |
| <b>Gender</b>                                      |                   |             | 0.110 <sup>b</sup> |
| Male                                               | 14(77.8%)         | 56(57.7%)   |                    |
| Female                                             | 4(22.2%)          | 41(42.3%)   |                    |
| <b>Age, Mean (SD)</b>                              | 54.4(12.89)       | 56.3(11.64) | 0.528 <sup>c</sup> |
| <b>BMI, Median (IQR)</b>                           | 29(25.7-31-7)     | 29(26-32.5) | 0.816 <sup>a</sup> |
| <b>Smoking status</b>                              |                   |             | 0.489 <sup>b</sup> |
| Never smoked                                       | 7(38.9%)          | 52(54.7%)   |                    |
| Former smoker                                      | 9(50%)            | 33(34.7%)   |                    |
| Current smoker                                     | 2(11.1%)          | 10(10.5%)   |                    |
| <b>Arterial Hypertension</b>                       |                   |             | 0.427 <sup>b</sup> |
| Yes                                                | 4(22.2%)          | 30(31.6%)   |                    |
| No                                                 | 14(77.8%)         | 65(68.4%)   |                    |
| <b>Severity</b>                                    |                   |             | 0.224 <sup>d</sup> |
| Group 1                                            | 0(0%)             | 10(11.1%)   |                    |
| Group 2                                            | 8(50%)            | 55(61.1%)   |                    |
| Group 3                                            | 5(31.3%)          | 15(16.7%)   |                    |
| Group 4                                            | 3(18.8%)          | 10(11.1%)   |                    |
| <b>Charlson Comorbidity Index, Median(IQR)</b>     | 1(1-2.3)          | 2(1-3)      | 0.827 <sup>a</sup> |
| <b>Length of hospital stay (days), Median(IQR)</b> | 12(8-18)          | 10(6-16)    | 0.162 <sup>a</sup> |

a; Mann-Whitney test, b; Chi-square test, c; Independent samples t-test, d; Fischer's exact test

| Variables                    | Epworth sleepiness scale |               | p                        |
|------------------------------|--------------------------|---------------|--------------------------|
|                              | No EDS (≤10)             | EDS (>10)     |                          |
| <b>Gender</b>                |                          |               | 0.997 <sup>b</sup>       |
| Male                         | 63(61.2%)                | 11(61.1%)     |                          |
| Female                       | 40(38.8%)                | 7(38.9%)      |                          |
| <b>Age, Median(IQR)</b>      | 57(51-66)                | 48(42.5-56.5) | <b>0.002<sup>a</sup></b> |
| <b>BMI, Median(IQR)</b>      | 29(26-32)                | 29(26-34)     | 0.741 <sup>a</sup>       |
| <b>Smoking status</b>        |                          |               | 0.102 <sup>b</sup>       |
| Never smoked                 | 54(52.9%)                | 14(77.8%)     |                          |
| Former smoker                | 36(35.3%)                | 4(22.2%)      |                          |
| Current smoker               | 12(11.8%)                | 0(0%)         |                          |
| <b>Arterial Hypertension</b> |                          |               | 0.823 <sup>b</sup>       |

|                                                    |           |           |                          |
|----------------------------------------------------|-----------|-----------|--------------------------|
| Yes                                                | 31(30.4%) | 5(27.8%)  |                          |
| No                                                 | 71(69.6%) | 13(72.2%) |                          |
| <b>Severity</b>                                    |           |           | <0.999 <sup>c</sup>      |
| Group 1                                            | 9(9.4%)   | 1(6.3%)   |                          |
| Group 2                                            | 58(60.4%) | 10(62.5%) |                          |
| Group 3                                            | 18(18.8%) | 3(18.8%)  |                          |
| Group 4                                            | 11(11.5%) | 2(12.5%)  |                          |
| <b>Charlson Comorbidity Index, Median(IQR)</b>     | 2(1-3)    | 0(0-2)    | <b>0.001<sup>a</sup></b> |
| <b>Length of hospital stay (days), Median(IQR)</b> | 11(7-17)  | 8(5.5-14) | 0.168 <sup>a</sup>       |

*a; Mann-Whitney test, b; Chi-square test, c; Fischer's exact test*

| Variables                                          | Epworth sleepiness scale |                         |                             |                           | p                            |
|----------------------------------------------------|--------------------------|-------------------------|-----------------------------|---------------------------|------------------------------|
|                                                    | Normal Sleepiness (0-10) | Mild sleepiness (11-14) | Moderate Sleepiness (15-17) | Severe Sleepiness (18-24) |                              |
| <b>Gender</b>                                      |                          |                         |                             |                           | 0.098 <sup>b</sup>           |
| Male                                               | 63(61.2%)                | 9(69.2%)                | 0(0%)                       | 2(100%)                   |                              |
| Female                                             | 40(38.8%)                | 4(30.8%)                | 3(100%)                     | 0(0%)                     |                              |
| <b>Age, Median(IQR)</b>                            | 57(51-66)                | 47(37.5-49.5)           | 58                          | 62                        | <b>&lt;0.001<sup>a</sup></b> |
| <b>BMI, Median(IQR)</b>                            | 29(26-32)                | 29(25.2-34)             | 31                          | 28.5                      | 0.892 <sup>a</sup>           |
| <b>Smoking status</b>                              |                          |                         |                             |                           | 0.502 <sup>b</sup>           |
| Never smoked                                       | 54(52.9%)                | 10(76.9%)               | 3(100%)                     | 1(50%)                    |                              |
| Former smoker                                      | 36(35.3%)                | 3(23.1%)                | 0(0%)                       | 1(50%)                    |                              |
| Current smoker                                     | 12(11.8%)                | 0(0%)                   | 0(0%)                       | 0(0%)                     |                              |
| <b>Arterial Hypertension</b>                       |                          |                         |                             |                           | 0.015 <sup>b</sup>           |
| Yes                                                | 31(30.4%)                | 1(7.7%)                 | 2(66.7%)                    | 2(100%)                   |                              |
| No                                                 | 71(69.6%)                | 12(92.3%)               | 1(33.3%)                    | 0(0%)                     |                              |
| <b>Severity</b>                                    |                          |                         |                             |                           | 0.953 <sup>c</sup>           |
| Group 1                                            | 9(9.4%)                  | 1(7.7%)                 | 0(0%)                       | 0(0%)                     |                              |
| Group 2                                            | 58(60.4%)                | 8(61.5%)                | 1(100%)                     | 1(50%)                    |                              |
| Group 3                                            | 18(18.8%)                | 2(15.4%)                | 0(0%)                       | 1(50%)                    |                              |
| Group 4                                            | 11(11.5%)                | 2(15.4%)                | 0(0%)                       | 0(0%)                     |                              |
| <b>Charlson Comorbidity Index, Median(IQR)</b>     | 2(1-3)                   | 0(0-0.5)                | 2(0-0)                      | 2(2-2)                    | <b>&lt;0.001<sup>a</sup></b> |
| <b>Length of hospital stay (days), Median(IQR)</b> | 11(7-17)                 | 8(5.5-14)               | 6.5(4-0)                    | 19.5(6-0)                 | 0.196 <sup>a</sup>           |

*a; Mann-Whitney test, b; Chi-square test, c; Fischer's exact test*

| Variables                                          | FSS         |            | p                        |
|----------------------------------------------------|-------------|------------|--------------------------|
|                                                    | <4          | ≥4         |                          |
| <b>Gender</b>                                      |             |            | 0.474 <sup>b</sup>       |
| Male                                               | 38(64.4%)   | 36(58.1%)  |                          |
| Female                                             | 21(35.6%)   | 26(41.9%)  |                          |
| <b>Age, Mean(SD)</b>                               | 59.1(10.41) | 53(12.03)  | <b>0.004<sup>a</sup></b> |
| <b>BMI, Mean(SD)</b>                               | 28.6(4.58)  | 30.5(5.50) | <b>0.043<sup>a</sup></b> |
| <b>Smoking status</b>                              |             |            | 0.705 <sup>b</sup>       |
| Never smoked                                       | 34(57.6%)   | 34(55.7%)  |                          |
| Former smoker                                      | 18(30.5%)   | 22(36.1%)  |                          |
| Current smoker                                     | 7(11.9%)    | 5(8.2%)    |                          |
| <b>Arterial Hypertension</b>                       |             |            | 0.604 <sup>b</sup>       |
| Yes                                                | 19(32.2%)   | 17(27.9%)  |                          |
| No                                                 | 40(67.8%)   | 44(72.1%)  |                          |
| <b>Severity</b>                                    |             |            | 0.928 <sup>b</sup>       |
| Group 1                                            | 5(9.1%)     | 5(8.8%)    |                          |
| Group 2                                            | 35(63.6%)   | 33(57.9%)  |                          |
| Group 3                                            | 9(16.4%)    | 12(21.1%)  |                          |
| Group 4                                            | 6(10.9%)    | 7(12.3%)   |                          |
| <b>Charlson Comorbidity Index, Median(IQR)</b>     | 2(1-3)      | 1(0-2)     | <b>0.042<sup>c</sup></b> |
| <b>Length of hospital stay (days), Median(IQR)</b> | 11(7-16.5)  | 9(6-16.8)  | 0.509 <sup>c</sup>       |

a; Independent samples t-test, b; Chi-square test, c; Mann-Whitney test

| Variables                    | STOP-Bang     |                         |                | p                            |
|------------------------------|---------------|-------------------------|----------------|------------------------------|
|                              | Low risk (≤2) | Intermediate risk (3-4) | High risk (≥5) |                              |
| <b>Gender</b>                |               |                         |                | <b>&lt;0.001<sup>b</sup></b> |
| Male                         | 22(40.7%)     | 38(74.5%)               | 14(87.5%)      |                              |
| Female                       | 32(59.3%)     | 13(25.5%)               | 2(12.5%)       |                              |
| <b>Age, Mean(SD)</b>         | 54.5(11.80)   | 58.2(11.55)             | 53.9(10.78)    | 0.202 <sup>a</sup>           |
| <b>BMI, Median(IQR)</b>      | 27(25-31)     | 30(26-32)               | 33(29-35)      | <b>0.004<sup>c</sup></b>     |
| <b>Smoking status</b>        |               |                         |                | 0.391 <sup>b</sup>           |
| Never smoked                 | 35(64.8%)     | 25(50%)                 | 8(50%)         |                              |
| Former smoker                | 13(24.1%)     | 21(42%)                 | 6(37.5%)       |                              |
| Current smoker               | 6(11.1%)      | 4(8%)                   | 2(12.5%)       |                              |
| <b>Arterial Hypertension</b> |               |                         |                | <b>&lt;0.001<sup>b</sup></b> |
| Yes                          | 7(13%)        | 20(40%)                 | 9(56.3%)       |                              |
| No                           | 47(87%)       | 30(60%)                 | 7(43.8%)       |                              |
| <b>Severity</b>              |               |                         |                | 0.707 <sup>d</sup>           |
| Group 1                      | 3(6.1%)       | 6(12.5%)                | 1(6.7%)        |                              |
| Group 2                      | 30(61.2%)     | 28(58.3%)               | 10(66.7%)      |                              |

|                                                    |           |            |           |                    |
|----------------------------------------------------|-----------|------------|-----------|--------------------|
| Group 3                                            | 9(18.4%)  | 8(16.7%)   | 4(26.7%)  |                    |
| Group 4                                            | 7(14.3%)  | 6(12.5%)   | 0(0%)     |                    |
| <b>Charlson Comorbidity Index, Median(IQR)</b>     | 1(0-2)    | 2(1-3.3)   | 1.5(1-2)  | 0.113 <sup>c</sup> |
| <b>Length of hospital stay (days), Median(IQR)</b> | 9(6-16.8) | 12(6.5-16) | 8.5(7-24) | 0.780 <sup>c</sup> |

a; One-way ANOVA, b; Chi-square test, c; Kruskal Wallis test, d; Fischer's exact test

| Variables                                          | Athens Insomnia Scale |             | p                            |
|----------------------------------------------------|-----------------------|-------------|------------------------------|
|                                                    | <6                    | ≥6          |                              |
| <b>Gender</b>                                      |                       |             | <b>&lt;0.001<sup>b</sup></b> |
| Male                                               | 43(79.6%)             | 31(44.3%)   |                              |
| Female                                             | 11(20.4%)             | 39(55.7%)   |                              |
| <b>Age, Mean(SD)</b>                               | 57.8(11.71)           | 54.7(11.53) | 0.138 <sup>a</sup>           |
| <b>BMI, Mean(SD)</b>                               | 28.5(3.72)            | 30.6(6.02)  | <b>0.018<sup>a</sup></b>     |
| <b>Smoking status</b>                              |                       |             | 0.852 <sup>b</sup>           |
| Never smoked                                       | 28(52.8%)             | 40(58%)     |                              |
| Former smoker                                      | 19(35.8%)             | 22(31.9%)   |                              |
| Current smoker                                     | 6(11.3%)              | 7(10.1%)    |                              |
| <b>Arterial Hypertension</b>                       |                       |             | 0.846 <sup>b</sup>           |
| Yes                                                | 17(32.1%)             | 21(30.4%)   |                              |
| No                                                 | 36(67.9%)             | 48(69.6%)   |                              |
| <b>Severity</b>                                    |                       |             | 0.512 <sup>b</sup>           |
| Group 1                                            | 3(6%)                 | 7(10.9%)    |                              |
| Group 2                                            | 30(60%)               | 40(62.5%)   |                              |
| Group 3                                            | 12(24%)               | 9(14.1%)    |                              |
| Group 4                                            | 5(10%)                | 8(12.5%)    |                              |
| <b>Charlson Comorbidity Index, Median(IQR)</b>     | 2(1-3)                | 1(0.8-3)    | 0.204 <sup>c</sup>           |
| <b>Length of hospital stay (days), Median(IQR)</b> | 12(8-18)              | 8(5.3-15.8) | <b>0.014<sup>c</sup></b>     |

a; Independent samples t-test, b; Chi-square test, c; Mann-Whitney test

| Variables             | Athens Insomnia Scale     |              |                  |                | p                            |
|-----------------------|---------------------------|--------------|------------------|----------------|------------------------------|
|                       | Absence of insomnia (0–5) | Mild (6-9)   | Moderate (10-15) | Severe (16-24) |                              |
| <b>Gender</b>         |                           |              |                  |                | <b>&lt;0.001<sup>b</sup></b> |
| Male                  | 43(79.6%)                 | 11(36.7%)    | 16(53.3%)        | 4(40%)         |                              |
| Female                | 11(20.4%)                 | 19(63.3%)    | 14(46.7%)        | 6(60%)         |                              |
| <b>Age, Mean(SD)</b>  | 57.81(11.71)              | 56.20(10.52) | 52.86(11.23)     | 55.3(15.41)    | 0.331 <sup>a</sup>           |
| <b>BMI, Mean(SD)</b>  | 28.49(3.72)               | 29.86(6.15)  | 30.93(5.6)       | 32(7.12)       | 0.092 <sup>a</sup>           |
| <b>Smoking status</b> |                           |              |                  |                | 0.778 <sup>c</sup>           |
| Never smoked          | 28(52.8%)                 | 15(50%)      | 19(65.5%)        | 6(60%)         |                              |

|                                                    |           |           |           |           |                    |
|----------------------------------------------------|-----------|-----------|-----------|-----------|--------------------|
| Former smoker                                      | 19(35.8%) | 10(33.3%) | 8(27.6%)  | 4(40%)    |                    |
| Current smoker                                     | 6(11.3%)  | 5(16.7%)  | 2(6.9%)   | 0(0%)     |                    |
| <b>Arterial Hypertension</b>                       |           |           |           |           | 0.773 <sup>b</sup> |
| Yes                                                | 17(32.1%) | 10(33.3%) | 7(24.1%)  | 4(40%)    |                    |
| No                                                 | 36(67.9%) | 20(66.7%) | 22(75.9%) | 6(60%)    |                    |
| <b>Severity</b>                                    |           |           |           |           | 0.824 <sup>c</sup> |
| Group 1                                            | 3(6%)     | 4(13.3%)  | 3(11.5%)  | 0(0%)     |                    |
| Group2                                             | 30(60%)   | 17(56.7%) | 16(61.5%) | 7(87.5%)  |                    |
| Group 3                                            | 12(24%)   | 5(16.7%)  | 4(15.4%)  | 0(0%)     |                    |
| Group 4                                            | 5(10%)    | 4(13.3%)  | 3(11.5%)  | 1(12.5%)  |                    |
| <b>Charlson Comorbidity Index, Median(IQR)</b>     | 2(1-3)    | 2(1-2.3)  | 1(0-3)    | 1.5(0-3)  | 0.471 <sup>d</sup> |
| <b>Length of hospital stay (days), Median(IQR)</b> | 12(8-18)  | 8(5-15.5) | 8(6-16.5) | 8(4.8-13) | 0.091 <sup>d</sup> |

*a; One-way ANOVA, b; Chi-square test, c; Fischer's exact test, d; Kruskal-Wallis test*

**Table S2. Normality tests for Charlson comorbidity index and Length of hospital stay according to PSQI Global score, Epworth sleepiness scale, FSS, STOP-Bang scale, AIS**

|                                |                   | <b>Tests of Normality</b>           |    |        |
|--------------------------------|-------------------|-------------------------------------|----|--------|
|                                |                   | Kolmogorov-Smirnov/<br>Shapiro-Wilk |    |        |
|                                | PSQI Global score | Statistic                           | df | p      |
| Charlson comorbidity index     | <5                | 0.875                               | 18 | 0.021  |
|                                | ≥5                | 0.181                               | 96 | <0.001 |
| Length of hospital stay (days) | <5                | 0.845                               | 17 | 0.009  |
|                                | ≥5                | 0.188                               | 95 | <0.001 |

  

|                                |                          | <b>Tests of Normality</b>           |     |        |
|--------------------------------|--------------------------|-------------------------------------|-----|--------|
|                                |                          | Kolmogorov-Smirnov/<br>Shapiro-Wilk |     |        |
|                                | Epworth sleepiness scale | Statistic                           | df  | p      |
| Charlson comorbidity index     | No EDS (≤10)             | 0.201                               | 102 | <0.001 |
|                                | EDS (>10)                | 0.717                               | 18  | <0.001 |
| Length of hospital stay (days) | No EDS (≤10)             | 0.146                               | 100 | <0.001 |
|                                | EDS (>10)                | 0.813                               | 17  | 0.003  |

  

|  |  | <b>Tests of Normality</b>           |  |  |
|--|--|-------------------------------------|--|--|
|  |  | Kolmogorov-Smirnov/<br>Shapiro-Wilk |  |  |

|                                | Epworth sleepiness scale    | Statistic | df  | p      |
|--------------------------------|-----------------------------|-----------|-----|--------|
| Charlson comorbidity index     | Normal Sleepiness (0-10)    | 0.201     | 102 | <0.001 |
|                                | Mild sleepiness (11-14)     | 0.456     | 13  | <0.001 |
|                                | Moderate Sleepiness (15-17) | 0.964     | 3   | 0.637  |
|                                | Severe Sleepiness (18-24)   |           | 2   |        |
| Length of hospital stay (days) | Normal Sleepiness (0-10)    | 0.146     | 100 | <0.001 |
|                                | Mild sleepiness (11-14)     | 0.146     | 13  | .200*  |
|                                | Moderate Sleepiness (15-17) | 0.260     | 2   |        |
|                                | Severe Sleepiness (18-24)   | 0.260     | 2   |        |

|                                |     | <b>Tests of Normality</b>           |    |        |
|--------------------------------|-----|-------------------------------------|----|--------|
|                                |     | Kolmogorov-Smirnov/<br>Shapiro-Wilk |    |        |
|                                | FSS | Statistic                           | df | p      |
| Charlson comorbidity index     | <4  | 0.213                               | 59 | <0.001 |
|                                | ≥4  | 0.197                               | 61 | <0.001 |
| Length of hospital stay (days) | <4  | 0.163                               | 57 | 0.001  |
|                                | ≥4  | 0.172                               | 60 | <0.001 |

|                                |                         | <b>Tests of Normality</b>           |    |        |
|--------------------------------|-------------------------|-------------------------------------|----|--------|
|                                |                         | Kolmogorov-Smirnov/<br>Shapiro-Wilk |    |        |
|                                | STOP-Bang               | Statistic                           | df | p      |
| Charlson comorbidity index     | Low risk (≤2)           | 0.191                               | 54 | <0.001 |
|                                | Intermediate risk (3-4) | 0.201                               | 50 | <0.001 |
|                                | High risk (≥5)          | 0.897                               | 16 | 0.071  |
| Length of hospital stay (days) | Low risk (≤2)           | 0.192                               | 52 | <0.001 |
|                                | Intermediate risk (3-4) | 0.112                               | 49 | 0.169  |
|                                | High risk (≥5)          | 0.787                               | 16 | 0.002  |

|                                |                       | <b>Tests of Normality</b>           |    |        |
|--------------------------------|-----------------------|-------------------------------------|----|--------|
|                                |                       | Kolmogorov-Smirnov/<br>Shapiro-Wilk |    |        |
|                                | Athens Insomnia Scale | Statistic                           | df | p      |
| Charlson comorbidity index     | <6                    | 0.217                               | 53 | <0.001 |
|                                | ≥6                    | 0.193                               | 70 | <0.001 |
| Length of hospital stay (days) | <6                    | 0.177                               | 52 | <0.001 |
|                                | ≥6                    | 0.179                               | 68 | <0.001 |

| <b>Tests of Normality</b> |  |  |  |  |
|---------------------------|--|--|--|--|
|---------------------------|--|--|--|--|

|                                   | Athens Insomnia Scale     | Kolmogorov-Smirnov/<br>Shapiro-Wilk |    |        |
|-----------------------------------|---------------------------|-------------------------------------|----|--------|
|                                   |                           | Statistic                           | df | p      |
| Charlson comorbidity index        | Absence of insomnia (0–5) | 0.217                               | 53 | <0.001 |
|                                   | Mild (6-9)                | 0.197                               | 30 | 0.004  |
|                                   | Moderate (10-15)          | 0.227                               | 30 | <0.001 |
|                                   | Severe (16-24)            | 0.852                               | 10 | 0.061  |
| Length of hospital stay<br>(days) | Absence of insomnia (0–5) | 0.177                               | 52 | <0.001 |
|                                   | Mild (6-9)                | 0.162                               | 29 | 0.049  |
|                                   | Moderate (10-15)          | 0.244                               | 29 | <0.001 |
|                                   | Severe (16-24)            | 0.869                               | 10 | 0.096  |

**Table S3. Mixed effects model for assessment tools**

|                                        | <b>b</b> | <b>SE</b> | <b>t</b> | <b>p</b>         | <b>95% CI</b>   |
|----------------------------------------|----------|-----------|----------|------------------|-----------------|
| <i><b>Epworth Sleepiness Scale</b></i> |          |           |          |                  |                 |
| Time                                   | -0.138   | 0.183     | -0.75    | 0.452            | (-0.497,0.222)  |
| Gender                                 |          |           |          |                  |                 |
| Male                                   | 1.092    | 0.691     | 1.58     | 0.114            | (-0.264,2.447)  |
| Female                                 | Ref.     |           |          |                  |                 |
|                                        | category |           |          |                  |                 |
| Age                                    | -0.065   | 0.047     | -1.37    | 0.171            | (-0.157,0.028)  |
| BMI                                    | 0.084    | 0.065     | 1.28     | 0.199            | (-0.044,0.211)  |
| Severity                               |          |           |          |                  |                 |
| Group 1                                | Ref.     |           |          |                  |                 |
|                                        | category |           |          |                  |                 |
| Group 2                                | -1.19    | 1.173     | -1.01    | 0.310            | (-3.490,1.110)  |
| Group 3                                | -2.165   | 1.33      | -1.63    | 0.103            | (-4.771,0.441)  |
| Group 4                                | -2.264   | 1.447     | -1.56    | 0.118            | (-5.100,0.572)  |
| Charlson Comorbidity<br>Index          | -0.398   | 0.34      | -1.17    | 0.242            | (-1.064,0.268)  |
| <i><b>FSS Scale</b></i>                |          |           |          |                  |                 |
| Time                                   | -0.376   | 0.086     | -4.37    | <b>&lt;0.001</b> | (-0.544,-0.207) |
| Gender                                 |          |           |          |                  |                 |
| Male                                   | -0.398   | 0.289     | -1.38    | 0.169            | (-0.965,0.169)  |

|                                     |                  |       |       |              |                 |
|-------------------------------------|------------------|-------|-------|--------------|-----------------|
| Female                              | Ref.<br>category |       |       |              |                 |
| Age                                 | -0.04            | 0.02  | -2.02 | 0.043        | (-0.079,-0.001) |
| BMI                                 | 0.067            | 0.027 | 2.46  | 0.014        | (0.014,0.121)   |
| Severity                            |                  |       |       |              |                 |
| Group 1                             | Ref.<br>category |       |       |              |                 |
| Group 2                             | -0.152           | 0.49  | -0.31 | 0.757        | (-1.112,0.808)  |
| Group 3                             | -0.118           | 0.555 | -0.21 | 0.832        | (-1.206,0.970)  |
| Group 4                             | -0.355           | 0.604 | -0.59 | 0.557        | (-1.539,0.830)  |
| Charlson Comorbidity<br>Index       | 0.167            | 0.142 | 1.18  | 0.240        | (-0.111,0.445)  |
| <b><i>STOP-Bang</i></b>             |                  |       |       |              |                 |
| Time                                | 0.022            | 0.058 | 0.38  | 0.704        | (-0.092,0.136)  |
| Gender                              |                  |       |       |              |                 |
| Male                                | 1.268            | 0.224 | 5.67  | <0.001       | (0.830,1.706)   |
| Female                              | Ref.<br>category |       |       |              |                 |
| Age                                 | 0.02             | 0.015 | 1.28  | 0.200        | (-0.010,0.050)  |
| BMI                                 | 0.097            | 0.021 | 4.59  | <0.001       | (0.055,0.138)   |
| Severity                            |                  |       |       |              |                 |
| Group 1                             | Ref.<br>category |       |       |              |                 |
| Group 2                             | -0.155           | 0.379 | -0.41 | 0.683        | (-0.899,0.589)  |
| Group 3                             | -0.163           | 0.43  | -0.38 | 0.704        | (-1.006,0.679)  |
| Group 4                             | -0.684           | 0.468 | -1.46 | 0.144        | (-1.601,0.233)  |
| Charlson Comorbidity<br>Index       | 0.032            | 0.11  | 0.29  | 0.770        | (-0.183,0.248)  |
| <b><i>Athens Insomnia Scale</i></b> |                  |       |       |              |                 |
| Time                                | -0.487           | 0.244 | -2    | <b>0.046</b> | (-0.964,-0.009) |
| Gender                              |                  |       |       |              |                 |
| Male                                | -2.775           | 0.919 | -3.02 | 0.003        | (-4.577,-0.973) |
| Female                              | Ref.<br>category |       |       |              |                 |
| Age                                 | -0.034           | 0.063 | -0.55 | 0.585        | (-0.157,0.089)  |
| BMI                                 | 0.178            | 0.087 | 2.05  | 0.040        | (0.008,0.348)   |

|                            |          |       |       |       |                |
|----------------------------|----------|-------|-------|-------|----------------|
| Severity                   |          |       |       |       |                |
| Group 1                    | Ref.     |       |       |       |                |
|                            | category |       |       |       |                |
| Group 2                    | -0.991   | 1.592 | -0.62 | 0.534 | (-4.111,2.129) |
| Group 3                    | -0.685   | 1.79  | -0.38 | 0.702 | (-4.194,2.824) |
| Group 4                    | -0.926   | 1.952 | -0.47 | 0.635 | (-4.752,2.900) |
| Charlson Comorbidity Index | 0.002    | 0.454 | 0     | 0.997 | (-0.888,0.892) |

**Table S4. Mixed effects model for PSQI components and Global score**

|                                                | <b>b</b> | <b>SE</b> | <b>t</b> | <b>p</b> | <b>95% CI</b>   |
|------------------------------------------------|----------|-----------|----------|----------|-----------------|
| <b><i>PSQI C1—Subjective sleep quality</i></b> |          |           |          |          |                 |
| Time                                           | -0.028   | 0.04      | -0.7     | 0.460    | (-0.105,0.048)  |
| Gender                                         |          |           |          |          |                 |
| Male                                           | 0.017    | 0.13      | 0.13     | 0.900    | (-0.235,0.269)  |
| Female                                         | Ref.     |           |          |          |                 |
|                                                | category |           |          |          |                 |
| Age                                            | -0.004   | 0.01      | -0.4     | 0.670    | (-0.021,0.014)  |
| BMI                                            | 0.024    | 0.01      | 1.96     | 0.050    | (0,0.048)       |
| Severity                                       |          |           |          |          |                 |
| Group 1                                        | Ref.     |           |          |          |                 |
|                                                | category |           |          |          |                 |
| Group 2                                        | -0.315   | 0.22      | -1.4     | 0.150    | (-0.748,0.118)  |
| Group 3                                        | -0.44    | 0.25      | -1.8     | 0.070    | (-0.924,0.044)  |
| Group 4                                        | -0.065   | 0.27      | -0.2     | 0.810    | (-0.590,0.460)  |
| Charlson Comorbidity Index                     | -0.015   | 0.06      | -0.2     | 0.810    | (-0.138,0.108)  |
| <b><i>PSQI C2—Sleep latency</i></b>            |          |           |          |          |                 |
|                                                | <b>b</b> | <b>SE</b> | <b>t</b> | <b>P</b> | <b>95% CI</b>   |
| Time                                           | -0.083   | 0.05      | -1.8     | 0.070    | (-0.172,0.006)  |
| Gender                                         |          |           |          |          |                 |
| Male                                           | -0.381   | 0.14      | -2.7     | 0.010    | (-0.654,-0.109) |
| Female                                         | Ref.     |           |          |          |                 |
|                                                | category |           |          |          |                 |
| Age                                            | 0        | 0.01      | -0.1     | 0.960    | (-0.019,0.018)  |
| BMI                                            | 0.007    | 0.01      | 0.54     | 0.590    | (-0.019,0.033)  |

|                                                 |                  |           |          |          |                 |
|-------------------------------------------------|------------------|-----------|----------|----------|-----------------|
| Severity                                        |                  |           |          |          |                 |
| Group 1                                         | Ref.<br>category |           |          |          |                 |
| Group 2                                         | -0.189           | 0.24      | -0.8     | 0.430    | (-0.655,0.277)  |
| Group 3                                         | -0.387           | 0.27      | -1.5     | 0.150    | (-0.908,0.134)  |
| Group 4                                         | 0.03             | 0.29      | 0.1      | 0.920    | (-0.535,0.596)  |
| Charlson Comorbidity Index                      | 0.036            | 0.07      | 0.53     | 0.600    | (-0.097,0.168)  |
| <b><i>PSQI C3—Sleep duration</i></b>            | <b>b</b>         | <b>SE</b> | <b>t</b> | <b>p</b> | <b>95% CI</b>   |
| Time                                            | 0.035            | 0.05      | 0.69     | 0.490    | (-0.064,0.133)  |
| Gender                                          |                  |           |          |          |                 |
| Male                                            | 0.104            | 0.16      | 0.64     | 0.530    | (-0.216,0.424)  |
| Female                                          | Ref.<br>category |           |          |          |                 |
| Age                                             | 0.014            | 0.01      | 1.27     | 0.210    | (-0.008,0.036)  |
| BMI                                             | 0.012            | 0.02      | 0.81     | 0.420    | (-0.018,0.043)  |
| Severity                                        |                  |           |          |          |                 |
| Group 1                                         | Ref.<br>category |           |          |          |                 |
| Group 2                                         | -0.341           | 0.28      | -1.2     | 0.220    | (-0.889,0.208)  |
| Group 3                                         | -0.423           | 0.31      | -1.4     | 0.180    | (-1.036,0.190)  |
| Group 4                                         | -0.395           | 0.34      | -1.2     | 0.240    | (-1.061,0.270)  |
| Charlson Comorbidity Index                      | -0.102           | 0.08      | -1.3     | 0.200    | (-0.258,0.053)  |
| <b><i>PSQI C4—Habitual sleep efficiency</i></b> | <b>b</b>         | <b>SE</b> | <b>t</b> | <b>p</b> | <b>95% CI</b>   |
| Time                                            | -0.038           | 0.08      | -0.5     | 0.630    | (-0.191,0.115)  |
| Gender                                          |                  |           |          |          |                 |
| Male                                            | -0.385           | 0.18      | -2.2     | 0.030    | (-0.731,-0.038) |
| Female                                          | Ref.<br>category |           |          |          |                 |
| Age                                             | 0.01             | 0.01      | 0.81     | 0.420    | (-0.014,0.033)  |
| BMI                                             | 0.011            | 0.02      | 0.66     | 0.510    | (-0.022,0.044)  |
| Severity                                        |                  |           |          |          |                 |
| Group 1                                         | Ref.<br>category |           |          |          |                 |
| Group 2                                         | -0.418           | 0.3       | -1.4     | 0.160    | (-1.001,0.165)  |

|                                               |          |           |          |                  |                 |
|-----------------------------------------------|----------|-----------|----------|------------------|-----------------|
| Group 3                                       | -0.768   | 0.33      | -2.3     | 0.020            | (-1.422,-0.113) |
| Group 4                                       | -0.722   | 0.36      | -2       | 0.050            | (-1.430,-0.013) |
| Charlson Comorbidity Index                    | 0.021    | 0.09      | 0.24     | 0.810            | (-0.146,0.187)  |
| <b><i>PSQI C5—Sleep disturbance</i></b>       | <b>b</b> | <b>SE</b> | <b>t</b> | <b>p</b>         | <b>95% CI</b>   |
| Time                                          | -0.122   | 0.04      | -3.3     | <b>&lt;0.001</b> | (-0.194,-0.05)  |
| Gender                                        |          |           |          |                  |                 |
| Male                                          | -0.283   | 0.1       | -2.9     | <0.001           | (-0.477,-0.089) |
| Female                                        | Ref.     |           |          |                  |                 |
|                                               | category |           |          |                  |                 |
| Age                                           | -0.008   | 0.01      | -1.2     | 0.230            | (-0.021,0.005)  |
| BMI                                           | 0.018    | 0.01      | 1.88     | 0.060            | (-0.001,0.036)  |
| Severity                                      |          |           |          |                  |                 |
| Group 1                                       | Ref.     |           |          |                  |                 |
|                                               | category |           |          |                  |                 |
| Group 2                                       | -0.056   | 0.17      | -0.3     | 0.740            | (-0.386,0.273)  |
| Group 3                                       | -0.176   | 0.19      | -0.9     | 0.350            | (-0.546,0.193)  |
| Group 4                                       | -0.045   | 0.2       | -0.2     | 0.830            | (-0.446,0.355)  |
| Charlson Comorbidity Index                    | 0.035    | 0.05      | 0.73     | 0.470            | (-0.059,0.129)  |
| <b><i>PSQI C6—Use of sleep medication</i></b> | <b>b</b> | <b>SE</b> | <b>t</b> | <b>p</b>         | <b>95% CI</b>   |
| Time                                          | -0.033   | 0.04      | -0.8     | 0.410            | (-0.113,0.046)  |
| Gender                                        |          |           |          |                  |                 |
| Male                                          | -0.214   | 0.16      | -1.4     | 0.170            | (-0.517,0.090)  |
| Female                                        | Ref.     |           |          |                  |                 |
|                                               | category |           |          |                  |                 |
| Age                                           | -0.017   | 0.01      | -1.6     | 0.110            | (-0.038,0.004)  |
| BMI                                           | -0.017   | 0.02      | -1.2     | 0.240            | (-0.046,0.011)  |
| Severity                                      |          |           |          |                  |                 |
| Group 1                                       | Ref.     |           |          |                  |                 |
|                                               | category |           |          |                  |                 |
| Group 2                                       | -0.409   | 0.27      | -1.5     | 0.130            | (-0.931,0.113)  |
| Group 3                                       | -0.418   | 0.3       | -1.4     | 0.160            | (-1.001,0.165)  |
| Group 4                                       | -0.493   | 0.32      | -1.5     | 0.130            | (-1.127,0.140)  |
| Charlson Comorbidity Index                    | 0.177    | 0.08      | 2.34     | 0.020            | (0.029,0.325)   |

| <i>PSQI C7—Day Time</i>    |          |      |           |                  |                 |
|----------------------------|----------|------|-----------|------------------|-----------------|
| <i>dysfunctions</i>        | b        | SE   | t         | p                | 95% CI          |
| Time                       | -0.16    | 0.04 | -3.6      | <b>&lt;0.001</b> | (-0.247,-0.073) |
| Gender                     |          |      |           |                  |                 |
| Male                       | -0.213   | 0.11 | -1.9      | 0.050            | (-0.429,0.004)  |
| Female                     | Ref.     |      |           |                  |                 |
|                            | category |      |           |                  |                 |
| Age                        | -0.01    | 0.01 | -1.4      | 0.170            | (-0.025,0.004)  |
| BMI                        | 0.012    | 0.01 | 1.17      | 0.240            | (-0.008,0.033)  |
| Severity                   |          |      |           |                  |                 |
| Group 1                    | Ref.     |      |           |                  |                 |
|                            | category |      |           |                  |                 |
| Group 2                    | -0.005   | 0.19 | -0        | 0.980            | (-0.371,0.361)  |
| Group 3                    | 0.082    | 0.21 | 0.39      | 0.70             | (-0.329,0.493)  |
| Group 4                    | -0.296   | 0.23 | -1.3      | 0.190            | (-0.741,0.149)  |
| Charlson Comorbidity Index | -0.002   | 0.05 | -0        | 0.970            | (-0.106,0.102)  |
| <i>PSQI—Global score</i>   |          |      |           |                  |                 |
|                            | b        | SE   | t         | p                | 95% CI          |
| Time                       | -0.427   | 0.17 | -<br>2.57 | <b>0.010</b>     | (-0.754,-0.101) |
| Gender                     |          |      |           |                  |                 |
| Male                       | -1.28    | 0.65 | -<br>1.98 | 0.048            | (-2.547,-0.014) |
| Female                     | Ref.     |      |           |                  |                 |
|                            | category |      |           |                  |                 |
| Age                        | -0.02    | 0.05 | -<br>0.45 | 0.653            | (-0.108,0.067)  |
| BMI                        | 0.07     | 0.06 | 1.16      | 0.247            | (-0.049,0.190)  |
| Severity                   |          |      |           |                  |                 |
| Group 1                    | Ref.     |      |           |                  |                 |
|                            | category |      |           |                  |                 |
| Group 2                    | -1.618   | 1.11 | -<br>1.45 | 0.146            | (-3.800,0.564)  |
| Group 3                    | -2.579   | 1.24 | -<br>2.07 | 0.038            | (-5.016,-0.142) |
| Group 4                    | -1.92    | 1.35 | -<br>1.42 | 0.155            | (-4.567,0.728)  |

|                            |       |      |      |       |                |
|----------------------------|-------|------|------|-------|----------------|
| Charlson Comorbidity Index | 0.163 | 0.32 | 0.52 | 0.605 | (-0.456,0.782) |
|----------------------------|-------|------|------|-------|----------------|

**Figures S1-S12 (ANOVA illustrated results)**

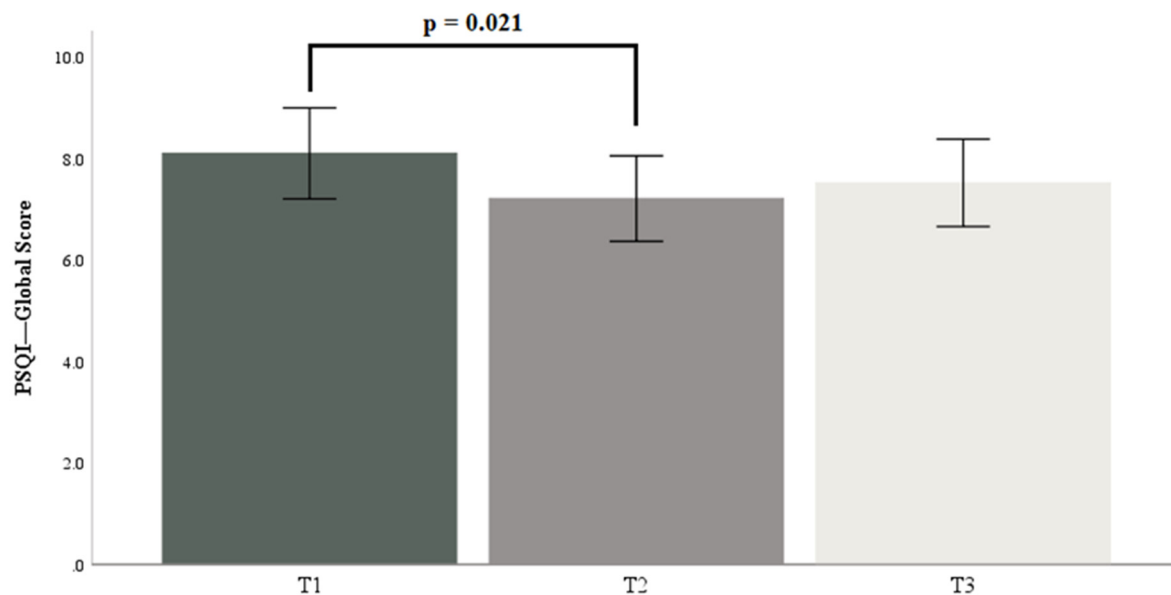

**Figure S1.** Mean PSQI—Global score for the three time points

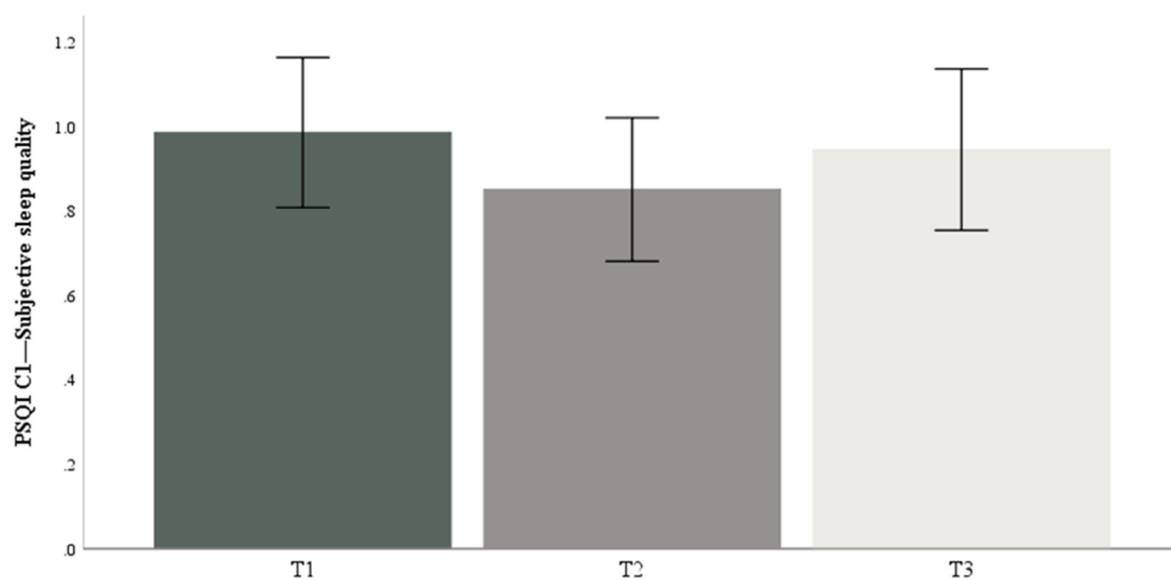

**Figure S2.** Mean PSQI C1—Subjective sleep quality score for the three time points

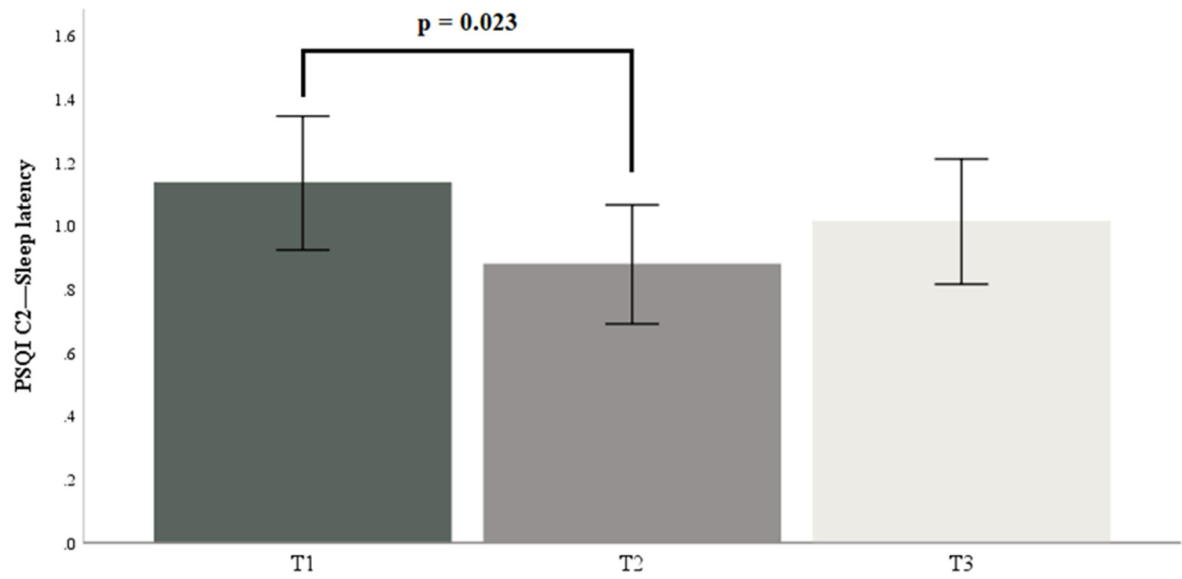

**Figure S3.** Mean PSQI C2—Sleep latency score for the three time points

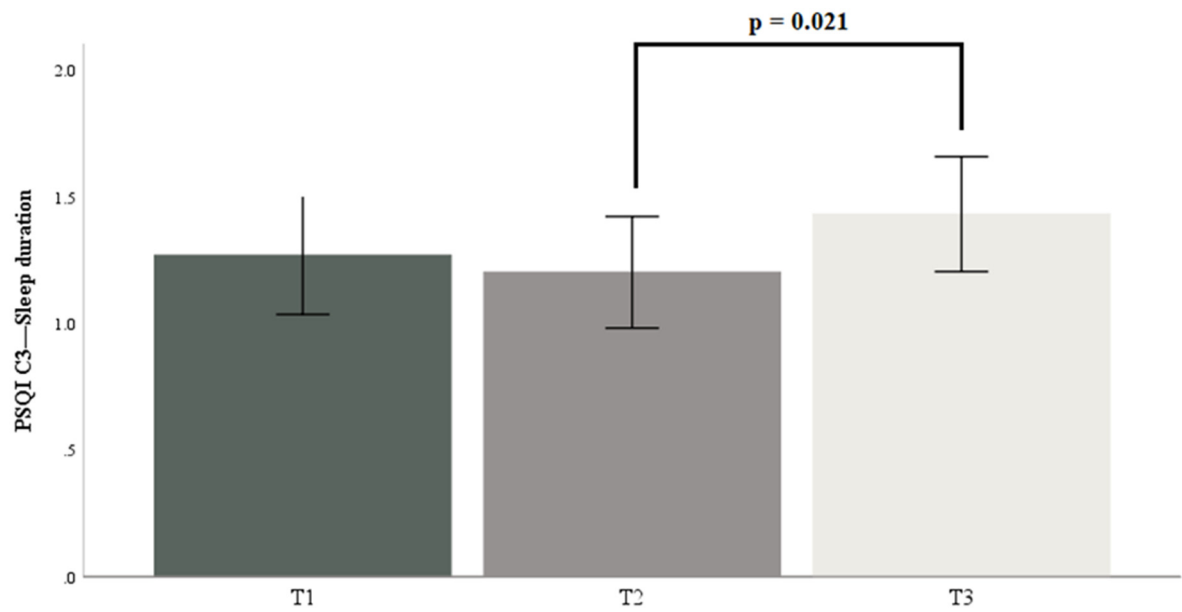

**Figure S4.** Mean PSQI C3—Sleep duration score for the three time points

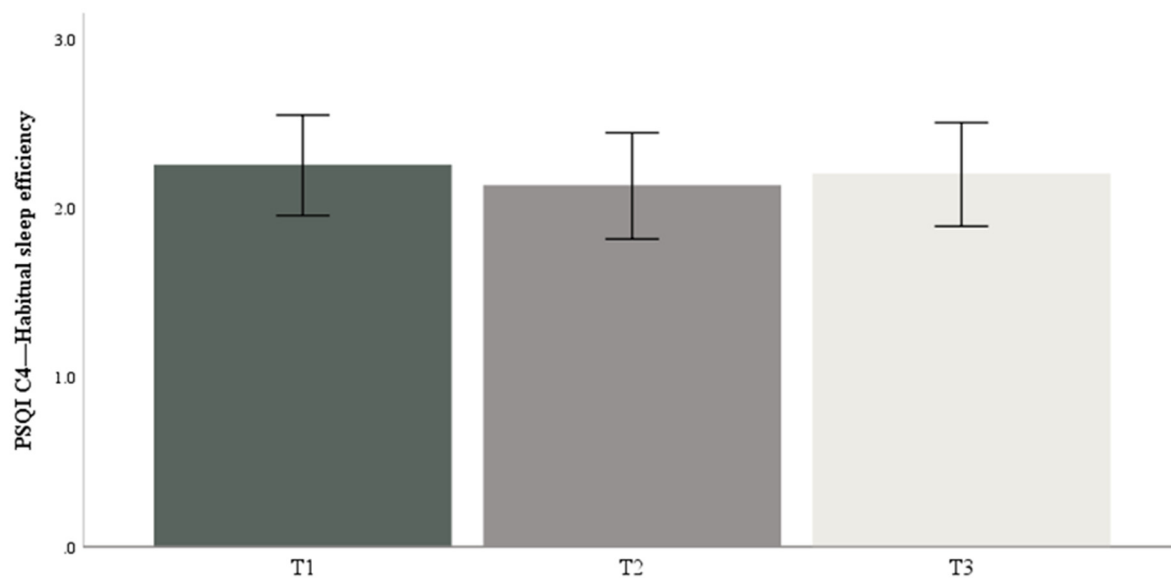

**Figure S5.** Mean PSQI C4—Habitual sleep efficiency score for the three time points

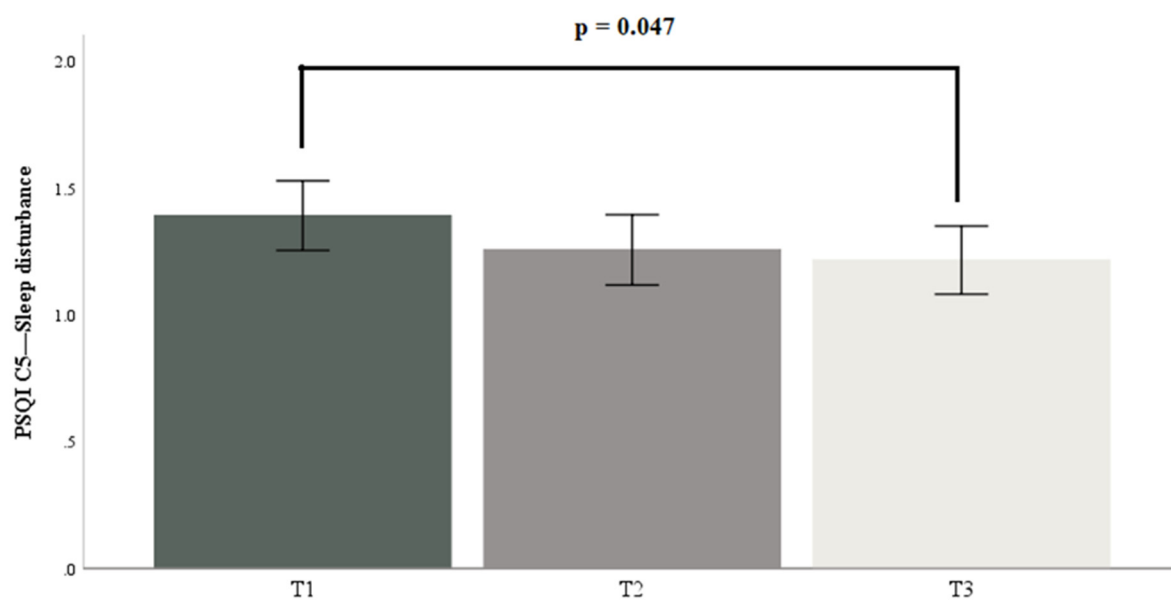

**Figure S6.** Mean PSQI C5—Sleep disturbance score for the three time points

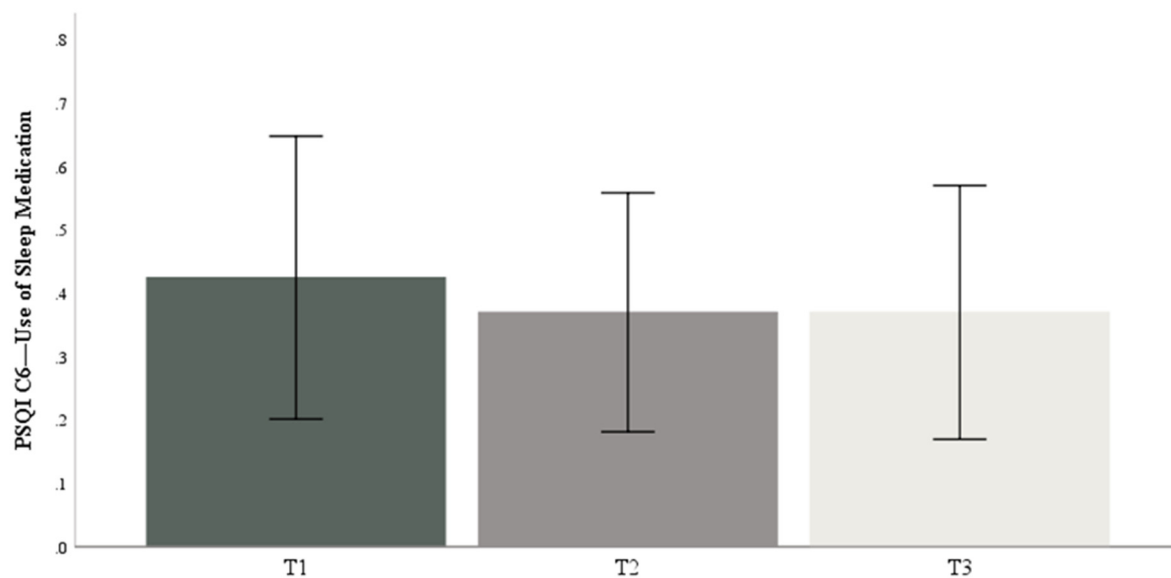

**Figure S7.** Mean PSQI C6—Use of Sleep Medication score for the three time points

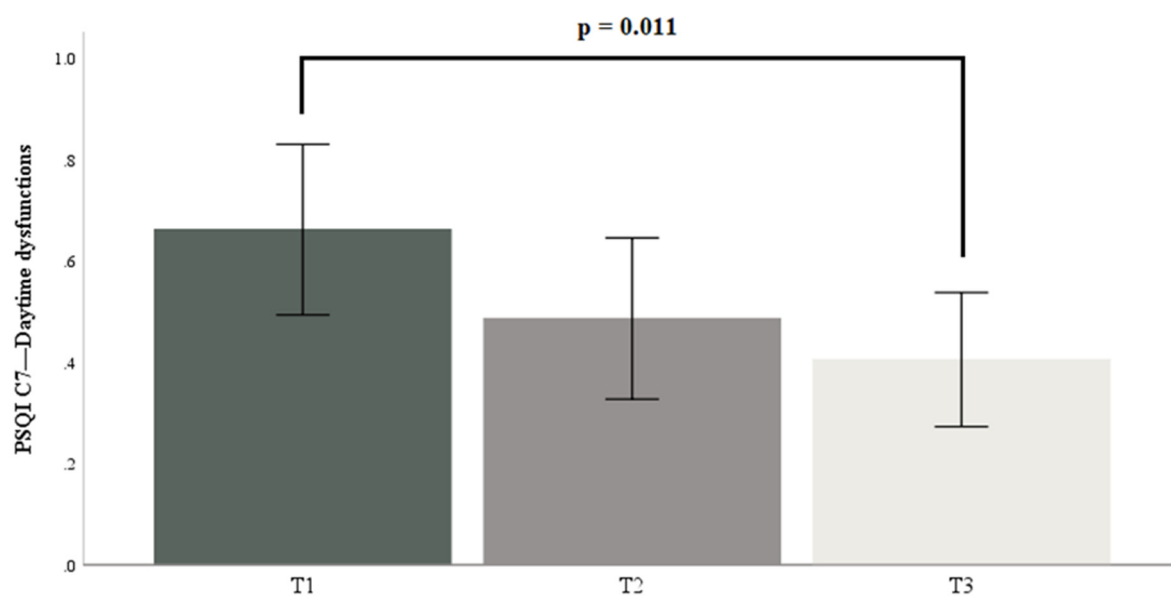

**Figure S8.** Mean PSQI C7—Daytime dysfunctions score for the three time points

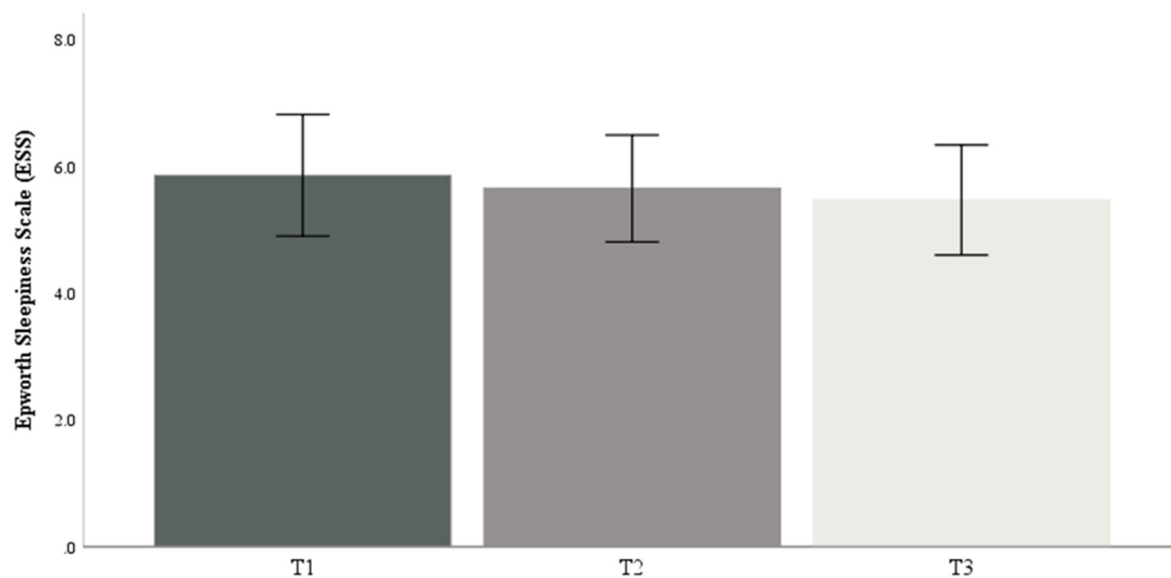

**Figure S9.** Mean Epworth Sleepiness Scale score for the three time points

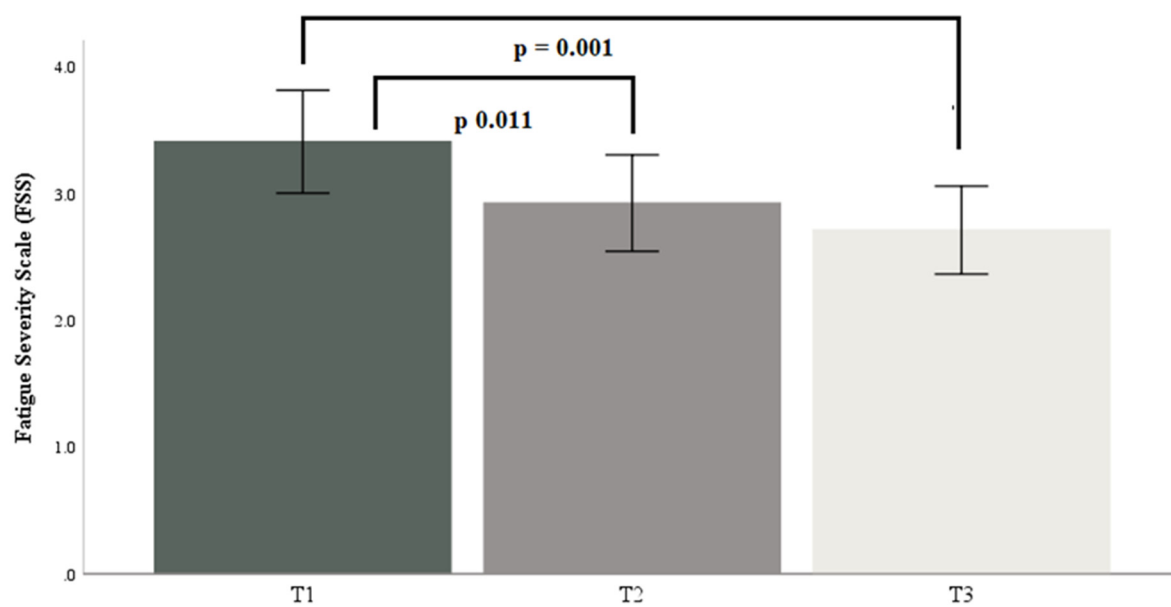

**Figure S10.** Mean Fatigue Severity Scale score for the three time points

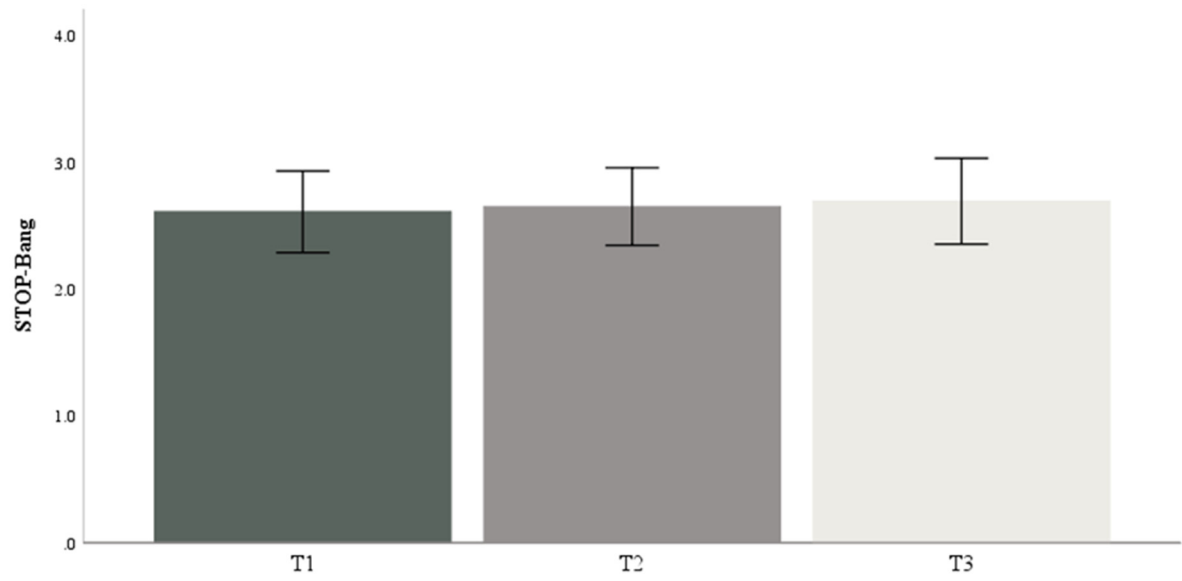

**Figure S11.** Mean STOP-Bang score for the three time points

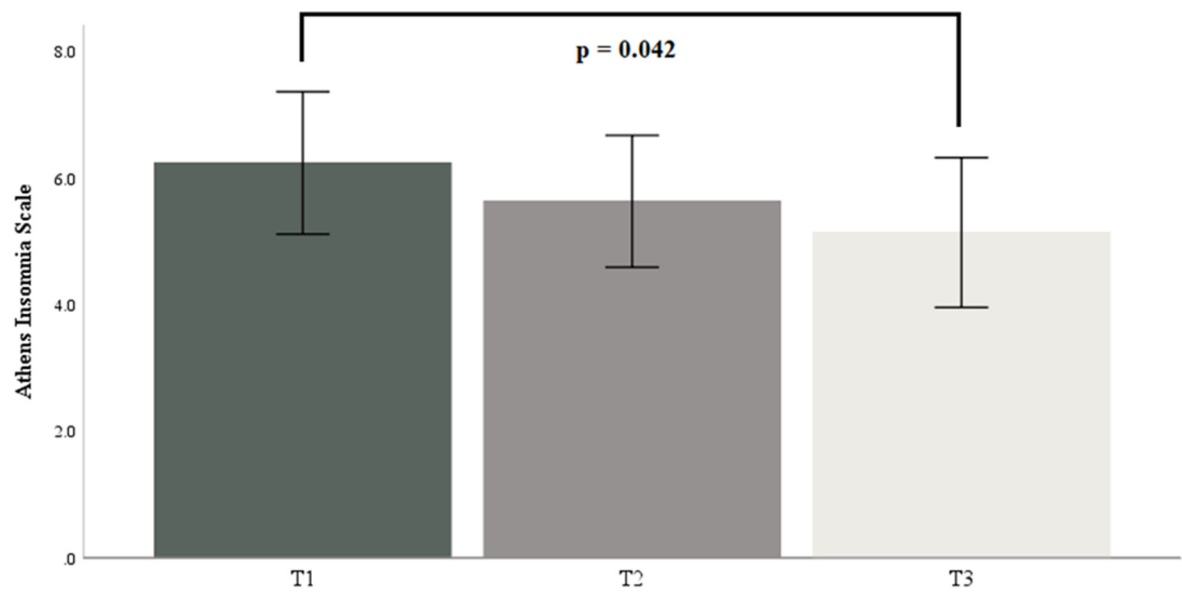

**Figure S12.** Mean Athens Insomnia Scale score for the three time points
